# Supplementary material
Source: Springer Nature journal article supplement (https://www.springermedizin.de/resource/supplementary/12876_2013_1098_MOESM1_ESM.pdf/9438416)
Supplement: MOESM1 [file 9438416]

I : Active UC Patients ●

IV : Patients' relative (non-kin) ○
